# Supplementary material for: Spousal Concordance of Hypertension Among Middle‐Aged and Older Heterosexual Couples Around the World: Evidence From Studies of Aging in the United States, England, China, and India
Source: PubMed Central journal article supplement — J Am Heart Assoc. 2023 Dec 6;12(24):e030765. doi: 10.1161/JAHA.123.030765 (PMC10863781; doi:10.1161/jaha.123.030765), 2023-12-06
Supplement: JAH3-12-e030765-s001.pdf [file JAH3-12-e030765-s001.pdf]

# **Supplemental Material**

**Data S1. Relationship between marginal prevalence of outcome and magnitude of prevalence ratios in dyadic studies.**

Say  $\Pr[W=1]$  is the marginal prevalence of hypertension among wives, and  $\Pr[H=1]$  is the marginal prevalence of hypertension among husbands.

Assuming an unbiased estimation...

$$\Pr[W = 1] = \Pr[W=1,H=1] + \Pr[W=1, H =0]$$

$$\Pr[H = 1] = \Pr[W=1,H=1] + \Pr[W=0, H =1]$$

If marginal prevalence are similar, i.e.

$$\Pr[W = 1] \sim \Pr[H = 1],$$

$$\text{then } \Pr[W = 1, H = 0] \sim \Pr[W = 0, H = 1]$$

**PR for Wife**

$$= \Pr[W=1|H=1] \div \Pr[W=1|H=0]$$

$$= \Pr[W = 1,H = 1]/\Pr[H = 1] \div \Pr[W = 1, H = 0]/\Pr[H=0]$$

$$= \Pr[W=1, H = 1]/(\Pr[W=1,H=1] + \Pr[W=0, H =1]) \div \Pr[W = 1, H = 0]/(\Pr[W=1,H=0] + \Pr[W=0, H =0])$$

**PR for Husband**

$$= \Pr[H=1|W=1] \div \Pr[H=1|W=0]$$

$$= \Pr[W = 1,H = 1]/\Pr[W = 1] \div \Pr[W = 0, H = 1]/\Pr[W=0]$$

$$= \Pr[W=1, H = 1]/(\Pr[W=1,H=1] + \Pr[W=1, H =0]) \div \Pr[W = 0, H = 1]/(\Pr[W=0,H=1] + \Pr[W=0, H =0])$$

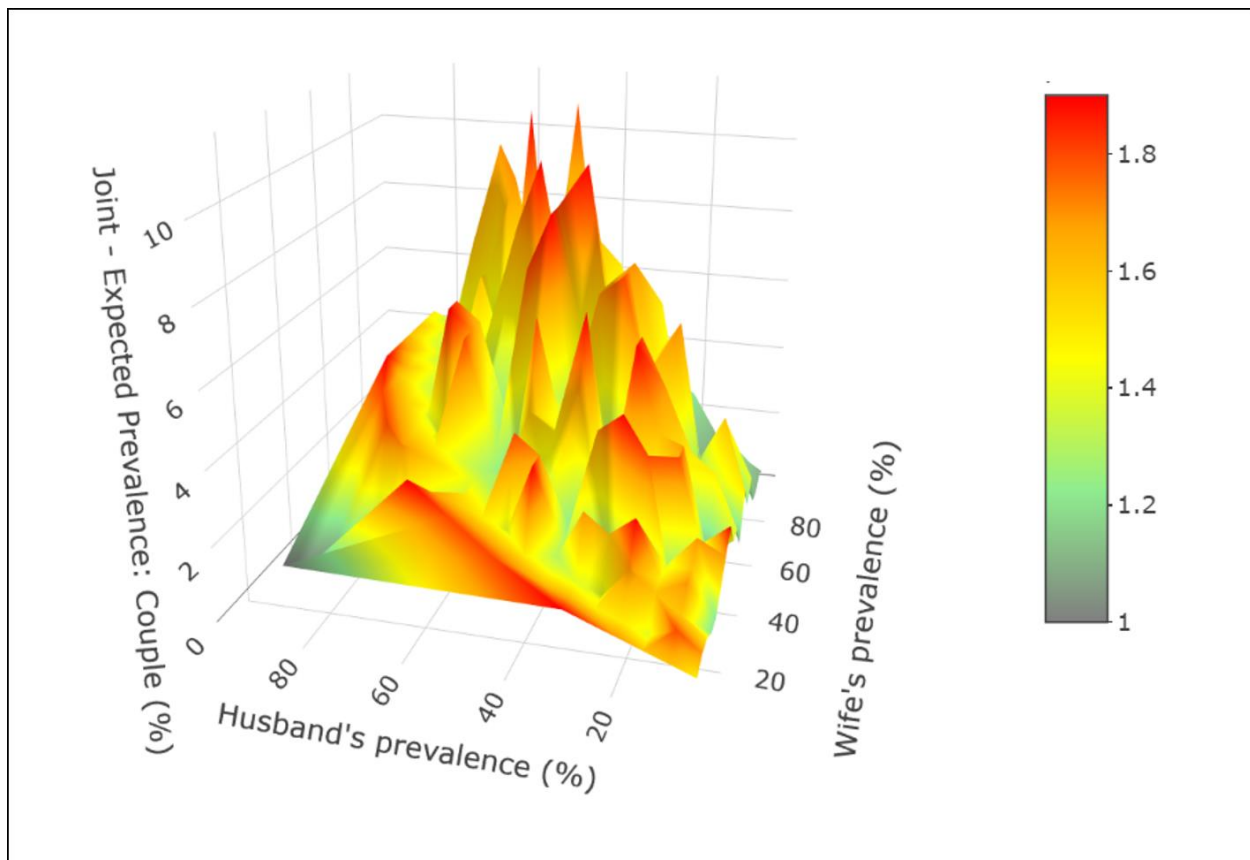

As marginal prevalence among husbands and wives increases, a larger difference between joint ( $\Pr[W=1, H=1]$ ) and expected prevalence ( $\Pr[W=1] \times \Pr[H=1]$ ) is required for similar prevalence ratios.

$$PR_{\text{wife}} = \Pr[W=1, H=1] / \Pr[H=1] \div (\Pr[W=1] - \Pr[W=1, H=1]) / (1 - \Pr[H=1])$$

When  $\Pr[W=1, H=1] / \Pr[H=1]$  increases (proportion of prevalence in husband explained by joint prevalence), assuming,  $\Pr[H=1] \sim \Pr[W=1]$ ,  $PR_{\text{wife}}$  keeps increasing. The above figure has been truncated at PR of 2.0, and hence, larger values of Joint – Expected prevalence are not displayed.

**Table S1. Study design and methodology to collect data**

| <b>Country</b>                                               | <b>United States</b>                                                                                                                                                                                                                                                                                                                                      | <b>England</b>                                                                                                                                                                                                                                                                     | <b>China</b>                                                                                                                                                                                                                                                                                                                       | <b>India</b>                                                                                                                                                                                                                                                                                                                                                                                     |
|--------------------------------------------------------------|-----------------------------------------------------------------------------------------------------------------------------------------------------------------------------------------------------------------------------------------------------------------------------------------------------------------------------------------------------------|------------------------------------------------------------------------------------------------------------------------------------------------------------------------------------------------------------------------------------------------------------------------------------|------------------------------------------------------------------------------------------------------------------------------------------------------------------------------------------------------------------------------------------------------------------------------------------------------------------------------------|--------------------------------------------------------------------------------------------------------------------------------------------------------------------------------------------------------------------------------------------------------------------------------------------------------------------------------------------------------------------------------------------------|
| <b>Cohort name</b>                                           | Health and Retirement study (HRS) <sup>19</sup>                                                                                                                                                                                                                                                                                                           | English Longitudinal Study on Ageing (ELSA) <sup>18</sup>                                                                                                                                                                                                                          | China Health and Retirement Longitudinal Study (CHARLS) <sup>17</sup>                                                                                                                                                                                                                                                              | Longitudinal Aging Study in India (LASI) <sup>20</sup>                                                                                                                                                                                                                                                                                                                                           |
| <b>When the cohort started</b>                               | 1992                                                                                                                                                                                                                                                                                                                                                      | 2002                                                                                                                                                                                                                                                                               | 2011-12                                                                                                                                                                                                                                                                                                                            | 2017-19                                                                                                                                                                                                                                                                                                                                                                                          |
| <b>Main sampling and survey method</b>                       | The HRS sample is based on a multi-stage area probability design involving geographical stratification and clustering and oversampling of certain demographic groups. The survey has been fielded every 2 years since 1992. HRS now employs a steady-state design, replenishing the sample every 6 years with younger cohorts not previously represented. | The sample was drawn from participants in the Health Survey for England (HSE), an annual cross-sectional survey that is designed to monitor the health of the general population. The survey has been fielded every 2 years. The sample was refreshed every three waves.           | Samples were chosen through multistage probability sampling. Because no pre-existing sampling frame of residents existed, the CHARLS team conducted mapping and listing operations within each village-level unit to obtain the sampling frame. The study has been fielded every 2-3 years. The sample was refreshed at each wave. | The LASI sampling frame included only the household population; persons living in collective institutional living arrangements were excluded. Considering the longitudinal design and the geographical and socioeconomic disparities in India, LASI adopted a multistage stratified area probability cluster sampling design. Follow-up waves are planned every 2–3 years for the next 25 years. |
| <b>Eligibility criteria of study participant recruitment</b> | A primary respondent is randomly selected from all age-eligible (50 years old and over) household members and, if the selected person is coupled, their spouse or partner is also included in the sample, regardless of age.                                                                                                                              | Membership of a participating household from Health Survey for England (HSE) in which at least one person had agreed to follow-up. In addition to the target sample, partners who were aged <50 years and those who had joined the household since HSE were invited for interview. | In each randomly selected household, one individual aged 45 or older was invited to participate together with his or her spouse, if available.                                                                                                                                                                                     | The target population for LASI included all Indian adult men and women aged 45 and older and their spouses regardless of age, who reside in the same household.                                                                                                                                                                                                                                  |
| <b>Data accessibility</b>                                    | Publicly available                                                                                                                                                                                                                                                                                                                                        | Publicly available                                                                                                                                                                                                                                                                 | Publicly available                                                                                                                                                                                                                                                                                                                 | Publicly available                                                                                                                                                                                                                                                                                                                                                                               |
| <b>Which wave of the data was used in the current study</b>  | 2016-17                                                                                                                                                                                                                                                                                                                                                   | 2016-17                                                                                                                                                                                                                                                                            | 2015-16                                                                                                                                                                                                                                                                                                                            | 2017-19                                                                                                                                                                                                                                                                                                                                                                                          |

**Table S2. Variable harmonization across four countries' datasets**

| Level        | Variable                                 | Harmonized variable name                   | Variable Type | HRS (Core, Rand, Gateway to aging)                | ELSA (core, Gateway to Aging) | CHARLS (Core, Gateway to Aging) | LASI (Core, Gateway to Aging) |
|--------------|------------------------------------------|--------------------------------------------|---------------|---------------------------------------------------|-------------------------------|---------------------------------|-------------------------------|
| Survey       | PSU (primary sampling unit)              | psu                                        |               | HHIDPN                                            | r8clust                       | communityID                     | ssuid                         |
| Survey       | Weight                                   | sampleweight                               |               | RAESTRAT, RAEHSAMP, R13WTHH, R13WTRESP, S13WTRESP | r8cwtresp, s8cwtresp          | R3WTRESP, S3WTRESP              | r1wtresp, s1wtresp            |
| Survey       | Household ID                             | hhid                                       |               | HHID                                              | hh8hhid                       | householdID                     | hhid                          |
| Survey       | Residence (Urban/Rural)                  | residence                                  | Categorical   |                                                   |                               | H3RURAL                         | hh1rural                      |
| Wife/Husband | Systolic BP                              | w_sbp, h_sbp                               | Continuous    | R13BPSYS, S13BPSYS                                | r8systo, s8systo              | R3SYSTO, S3SYSTO                | r1systo, s1systo              |
| Wife/Husband | Diastolic BP                             | w_dbp, h_dbp                               | Continuous    | R13BPDIA, S13BPDIA                                | r8diasto, s8diasto            | R3DIASTO, S3DIASTO              | r1diasto, s1diasto            |
| Wife/Husband | History of high BP                       | w_diagnosed_bp, h_diagnosed_bp             | Categorical   | R13HIBPE, S13HIBPE                                | r8hibpe, s8hibpe              | R3HIBPE, S3HIBPE                | r1hibpe, s1hibpe              |
| Wife/Husband | Currently taking medication for high BP  | w_medication_bp, h_medication_bp           | Categorical   | core HRS                                          | r8rxhibp, s8rxhibp            | R3RXHIBP, S3RXHIBP              | r1rxhibp, s1rxhibp            |
| Wife/Husband | Previously diagnosed with diabetes       | w_diagnosed_dm, h_diagnosed_dm             | Categorical   | R13DIABE, S13DIABE,                               | r8diabe, s8diabe              | R3DIABE, S3DIABE                | r1diabe, s1diabe              |
| Wife/Husband | Currently taking medication for diabetes | w_medication_dm, h_medication_dm           | Categorical   | core HRS                                          | r8rxdiab, s8rxdiab            | R3RXDIAB, S3RXDIAB              | r1rxdiab, s1rxdiab            |
| Wife/Husband | Weight (kg)                              | w_weight, h_weight                         | Continuous    | R13WEIGHT, S13WEIGHT                              | r8mweight, s8mweight          | R3MHEIGHT, S3MHEIGHT            | r1mweight, s1mweight          |
| Wife/Husband | Height (cm)                              | w_height, h_height                         | Continuous    | R13HEIGHT, S13HEIGHT                              | r8mheight, s8mheight          | R3MWEIGHT, S3MWEIGHT            | r1mheight, s1mheight          |
| Wife/Husband | BMI (kg/m <sup>2</sup> )                 | w_bmi, h_bmi                               | Continuous    | R13BMI, S13BMI                                    | r8mbmi, s8mbmi                | R3MBMI, S3MBMI                  | r1mbmi, s1mbmi                |
| Wife/Husband | Waist circumference                      | w_waistcircumference, h_waistcircumference | Continuous    | R13PMWAIST, S13PMWAIST                            | NA                            | R3MWAIST, S3MWAIST              | r1mwaist, s1mwaist            |

|                            |                                          |                                        |             |                      |                        |                        |                        |
|----------------------------|------------------------------------------|----------------------------------------|-------------|----------------------|------------------------|------------------------|------------------------|
| Wife/Husband               | Hip circumference                        | w_hipcircumference, h_hipcircumference | Continuous  | NA                   | NA                     | NA                     | r1mhip, s1mhip         |
| Wife/Husband               | Age (years)                              | w_age, h_age                           | Continuous  | R13AGEY_E, S13AGEY_E | r8agey, s8agey         | R3AGEY, S3AGEY         | r1agey, s1agey         |
| Wife/Husband               | Education level (harmonized)             | w_education_h, h_education_h           | Categorical | raeduc1              | raeduc1, s8educ1       | RAEDUCL                | raeduc_1, s1educ_1     |
| Wife/Husband               | Employment status                        | w_employment, h_employment             | Categorical | R13LBRF              | r8work, s8work         | R3WORK                 | r1work, s1work         |
| Wife/Husband               | Retirement status                        | w_retirement, h_retirement             | Categorical | R13LBRF              | r8retemp, s8retemp     | R3RETEMP, S3RETEMP     | r1sayret_1, s1sayret_1 |
| Wife/Husband               | Smoking ever                             | w_smokeever, h_smokeever               | Categorical | R13SMOKEV, S13SMOKEV | r8smokev, s8smokev     | R3SMOKEV, S3SMOKEV     | r1smokev, s1smokev     |
| Wife/Husband               | Smoking current                          | w_smokecurr, h_smokecurr               | Categorical | R13SMOKEN, S13SMOKEN | r8smoken, s8smoken     | R3SMOKEN, S3SMOKEN     | r1smoken, s1smoken     |
| Wife/Husband               | Alcohol in the past 3 months             | w_alcohol, h_alcohol                   | Categorical | R13DRINK, S13DRINK   | r8drink, s8drink       | R3DRINKL, S3DRINKL     | r1drink3m, s1drink3m   |
| Wife/Husband               | Moderate Physical activity (days)        | w_moderate_pa, h_moderate_pa           | Continuous  | R13MDACTX, S13MDACTX | r8mdactx_e, s8mdactx_e | R3MDACTX_C, S3MDACTX_C | r1vgactx, s1vgactx     |
| Wife/Husband               | Vigorous Physical activity (days)        | w_vigorous_pa, h_vigorous_pa           | Continuous  | R13VGACTX, S13VGACTX | r8vdactx_e, s8vdactx_e | R3VGACTX, S3VGACTX     | r1mdactx, s1mdactx     |
| household/couple           | Number of children                       | hh_children                            | Count       | H13CHILD             | r8child, s8child       | H3CHILD                | r1child, s1child       |
| household/couple           | number of people living in the household | hh_size                                | Count       | H13HHRES             | hh8hhresp              | H3HHRESP               |                        |
| household/couple           | income                                   | hh_income                              | Continuous  | H13ITOT              | h8itot                 | H3ITOT                 | hh1earn                |
| household/couple           | wealth                                   | hh_wealth                              | Continuous  | H13ATOTB             | h8atotb                | H3ATOTB                | hh1atotb               |
| household/couple           | length of current marriage (years)       | hh_lengthmar                           | Continuous  | R13MCURLN            | r8mcurln, s8mcurln     | R2MCURLN, S2MCURLN     | r1mcurln, s1mcurln     |
| Country-specific variables | Caste of head of household               | hh_caste                               | Categorical |                      |                        |                        | dm013                  |

|                            |                                       |                |             |                                        |                  |                    |       |
|----------------------------|---------------------------------------|----------------|-------------|----------------------------------------|------------------|--------------------|-------|
| Country-specific variables | Religion of head of household         | hh_religion    | Categorical | RARELIG, S13RELIG                      |                  |                    | dm010 |
| Country-specific variables | Race-ethnicity                        | w_race, h_race | Categorical | RARACEM, S13RACEM, RAHISPAN, S13HISPAN | raracem, s8racem |                    |       |
| Country-specific variables | Hukou status (household registration) | hh_hukou       | Categorical |                                        |                  | R3RURAL2, R3RURAL2 |       |

**Table S3. Comparison of questions ascertaining history of hypertension among participants by country**

| Country                       | Self-reported Diagnosis                                                                                                                                                                                                                                                                                                                                                                                                                                                                                                                                                                                                                                                                                                                                                                                                                                                                                                                                                                       | Self-reported Treatment                                                                                                                                                                                                                                                                                                                                                                                                                                                             |
|-------------------------------|-----------------------------------------------------------------------------------------------------------------------------------------------------------------------------------------------------------------------------------------------------------------------------------------------------------------------------------------------------------------------------------------------------------------------------------------------------------------------------------------------------------------------------------------------------------------------------------------------------------------------------------------------------------------------------------------------------------------------------------------------------------------------------------------------------------------------------------------------------------------------------------------------------------------------------------------------------------------------------------------------|-------------------------------------------------------------------------------------------------------------------------------------------------------------------------------------------------------------------------------------------------------------------------------------------------------------------------------------------------------------------------------------------------------------------------------------------------------------------------------------|
| <b>USA (HRS 2016-17)</b>      | Has a doctor ever told you that you have high blood pressure or hypertension? (Medical doctors include specialists such as Dermatologists, Psychiatrists, Ophthalmologists, Osteopaths, Cardiologists, as well as family doctors, internists and physicians' assistants. Also include diagnoses made by Nurses and Nurse Practitioners.)                                                                                                                                                                                                                                                                                                                                                                                                                                                                                                                                                                                                                                                      | In order to lower your blood pressure, are you now taking any medication?                                                                                                                                                                                                                                                                                                                                                                                                           |
| <b>England (ELSA 2016-17)</b> | <p>Our records show that when we last interviewed [^you / [^name]] on     [^date of last interview] [^you / he / she] said that [^you / he / she] had had (or had     been told by a doctor [^you / he / she] had had) high blood pressure or hypertension. Our records also show that when     we last interviewed [^you / [^name]] on [^date of last interview] [^you / he / she]     said that [^you / he / she] had had (or had been told by a doctor [^you / he / she]     had had)] high blood pressure or hypertension.</p> <p>[^Do you / Does [^name]] still have [^high blood pressure or hypertension?</p> <p>[^Has / Apart from what you have already told us, and thinking about what has happened since we last saw [^you / [^name]] on [^date of last interview] has] a doctor [^BLANK / ever] told [^you / [^name]] that [^you have / he has / she has] (or have had) any of the [^BLANK / other] conditions on this card?</p> <p>- 01 High blood pressure or hypertension</p> | <p>IF (type of cardiovascular disease condition = high blood pressure) OR (type of cardiovascular disease   condition at last interview = high blood pressure AND reason for disputing high blood pressure &lt;&gt;   Never had the condition, Misdiagnosed)</p> <p>Some doctors suggest that some patients take medication to lower their blood   pressure. Did a doctor or nurse ever suggest that you take any medication to lower   your blood pressure?<br/>  1 Yes   2 No</p> |
| <b>China (CHARLS 2015-16)</b> | Have you been diagnosed with Hypertension by a doctor?                                                                                                                                                                                                                                                                                                                                                                                                                                                                                                                                                                                                                                                                                                                                                                                                                                                                                                                                        | Are you now taking any of the following treatments to treat or control your hypertension?<br>Taking Chinese traditional medicine, taking Western modern medicine?                                                                                                                                                                                                                                                                                                                   |
| <b>India (LASI 2017-19)</b>   | Has any health professional ever told you that you have hypertension or high blood pressure?                                                                                                                                                                                                                                                                                                                                                                                                                                                                                                                                                                                                                                                                                                                                                                                                                                                                                                  | In order to control your blood pressure or hypertension, are you currently taking any medication?                                                                                                                                                                                                                                                                                                                                                                                   |



**Table S4. Number of missing observations by country**

|                                                           | USA   |          | England |          | China |          | India  |          |
|-----------------------------------------------------------|-------|----------|---------|----------|-------|----------|--------|----------|
| <b>Shared household characteristics</b>                   | Wives | Husbands | Wives   | Husbands | Wives | Husbands | Wives  | Husbands |
| Sample size (n)                                           | 3,989 |          | 1,086   |          | 6,514 |          | 22,389 |          |
| Residence (Rural, %)                                      | 54    |          |         |          | 770   |          | 0      |          |
| Wealth quintile of household                              | 0     |          |         |          | 2324  |          | 14     |          |
| Length of current marriage (years)                        | 349   |          |         |          | 1381  |          | 465    |          |
| Number of people in the same household                    | 0     |          |         |          | 0     |          | 0      |          |
| Number of children                                        | 46    |          |         |          | 0     |          | -      |          |
| <b>Socio-demographic characteristics</b>                  |       |          |         |          |       |          |        |          |
| Age (years)                                               | 0     | 0        | 0       | 0        | 0     | 0        | 0      | 0        |
| Education level                                           | 0     | 3        | 114     | 43       | 5     | 5        | 0      | 0        |
| Employment status                                         | 26    | 30       | 0       | 1        | 107   | 83       | 0      | 1        |
| <b>Health behaviors and self-reported health outcomes</b> |       |          |         |          |       |          |        |          |
| Smoking                                                   | 37    | 50       | 0       | 0        | 3     | 7        | 0      | 0        |
| Heavy drinking (Yes, %)                                   | 37    | 48       | 87      | 108      | 17    | 25       | 22     | 59       |
| Moderate Physical activity (days/week)                    | 31    | 38       | 0       | 0        | 3335  | 3356     | 26     | 51       |
| Vigorous Physical activity (days/week)                    | 45    | 48       | 0       | 0        | 3332  | 3345     | 24     | 45       |
| Self-reported diagnosis of hypertension (%)               | 31    | 41       | 0       | 0        | 1071  | 1069     | 0      | 0        |
| Diagnosis of diabetes (%)                                 | 29    | 36       | 0       | 0        | 1115  | 1113     | 0      | 0        |
| <b>Clinical measures</b>                                  |       |          |         |          |       |          |        |          |
| BMI (kg/m <sup>2</sup> )                                  | 97    | 47       | 51      | 59       | 264   | 351      | 398    | 613      |
| Waist circumference (cm)                                  | 1929  | 1904     | -       | -        | 254   | 324      | 397    | 619      |
| Systolic blood pressure (mmHg)                            | 0     | 0        | 86      | 93       | 259   | 306      | 302    | 415      |
| Diastolic blood pressure (mmHg)                           | 0     | 0        | 86      | 93       | 260   | 306      | 302    | 415      |
| Hypertension <sup>b</sup> (%)                             |       |          |         |          |       |          |        |          |
| Concordant Hypertension (%)                               | 0     |          | 0       |          | 0     |          | 0      |          |

**Table S5. Associations of hypertension status between couples for wives and husbands across countries**

|                                                                  | USA (n=3,989)     | England (n=1,086) | China (n=6,514)   | India (n=22,389)  |
|------------------------------------------------------------------|-------------------|-------------------|-------------------|-------------------|
| <i>Equation 1a</i>                                               |                   |                   |                   |                   |
| <b>Wife</b> <sup>a</sup>                                         | 1.09 (1.01, 1.17) | 1.09 (0.98, 1.21) | 1.26 (1.17, 1.35) | 1.19 (1.15, 1.24) |
| <i>Equation 1b</i>                                               |                   |                   |                   |                   |
| <b>Husband</b> <sup>a</sup>                                      | 1.06 (1.00, 1.13) | 1.05 (0.96,1.16)  | 1.26 (1.18, 1.35) | 1.20 (1.12, 1.28) |
| <i>Equation 2</i>                                                |                   |                   |                   |                   |
| <b>Sex differences (Husband: Wife)</b> <sup>b</sup>              | 0.92 (0.83, 1.02) | 0.95 (0.82, 1.10) | 0.94 (0.85, 1.04) | 0.97 (0.92, 1.03) |
| <i>Equation 3a</i>                                               |                   |                   |                   |                   |
| <b>Differences between countries among wives</b> <sup>c</sup>    | Ref (1.00)        | 0.97 (0.88, 1.11) | 1.13 (1.01, 1.26) | 1.19 (1.08, 1.31) |
| <i>Equation 3b</i>                                               |                   |                   |                   |                   |
| <b>Differences between countries among husbands</b> <sup>c</sup> | Ref (1.00)        | 0.98 (0.88, 1.11) | 1.18 (1.07, 1.29) | 1.20 (1.11, 1.30) |

All values are survey-weighted prevalence ratios with 95% robust confidence intervals, after adjusting for individual characteristics and household characteristics. Estimates of association may be numerically, but not statistically, different between models used (e.g. between survey-weighted Poisson regression of analysis separately by cohort and in pooled cohorts) due to differences in estimation method (maximum likelihood with survey design vs generalized estimating equations), confounding adjustment etc.

a. Prevalence ratio from survey-weighted regression models accounting for survey design

b. Ratio of prevalence ratio of husbands to wives from generalized estimating equations of pooled dataset

c. Ratio of prevalence ratio of country, relative to USA, from survey-weighted regression models with normalized weights in pooled dataset.

**Table S6. Associations of hypertension status between the couple for wives and husbands across countries before and after adjusting for individual, spousal and household characteristics**

|                                                                         | USA (n=3,989)     |                   | England (n=1,086) |                   | China (n=6,514)   |                   | India (n=22,389)  |                   |
|-------------------------------------------------------------------------|-------------------|-------------------|-------------------|-------------------|-------------------|-------------------|-------------------|-------------------|
|                                                                         | Wives             | Husbands          | Wives             | Husbands          | Wives             | Husbands          | Wives             | Husbands          |
|                                                                         | PR (95% CI)       |
| <b>Unadjusted for individual, spousal and household characteristics</b> | 1.25 (1.16, 1.35) | 1.18 (1.12, 1.25) | 1.15 (1.07, 1.23) | 1.10 (1.03, 1.17) | 1.41 (1.31, 1.52) | 1.39 (1.30, 1.48) | 1.39 (1.33, 1.45) | 1.35 (1.30, 1.41) |
| <b>Adjusted for individual characteristics</b>                          | 1.10 (1.02, 1.18) | 1.07 (1.01, 1.14) | 1.11 (1.01, 1.21) | 1.06 (0.99, 1.15) | 1.27 (1.18, 1.36) | 1.27 (1.18, 1.36) | 1.23 (1.17, 1.28) | 1.21 (1.17, 1.26) |
| <b>Adjusted for individual, spousal and household characteristics</b>   | 1.08 (1.00, 1.16) | 1.06 (1.00, 1.12) | 1.10 (0.99, 1.23) | 1.06 (0.96, 1.17) | 1.25 (1.16, 1.35) | 1.25 (1.17, 1.35) | 1.21 (1.16, 1.26) | 1.19 (1.15, 1.24) |

Reported associations are prevalence ratios (95%CI) without adjustment and after adjusting for individual (BMI, age, education, wage employment, smoking, heavy drinking, moderate physical activity, vigorous physical activity), spousal (BMI, age, education, wage employment, smoking, heavy drinking, moderate physical activity, vigorous physical activity), and household characteristics (wealth, number of residents, rural/urban residence, length of marriage).

**Table S7. Associations of hypertension status between the couple for wives and husbands across countries stratified by residence, wealth, length of marriage, age groups, and education**

|                                         | USA (n=3,989)     |                   | England (n=1,086) |                   | China (n=6,514)   |                   | India (n=22,389)  |                   |
|-----------------------------------------|-------------------|-------------------|-------------------|-------------------|-------------------|-------------------|-------------------|-------------------|
|                                         | Wives             | Husbands          | Wives             | Husbands          | Wives             | Husbands          | Wives             | Husbands          |
|                                         | PR (95% CI)       |
| <b>Shared household characteristics</b> |                   |                   |                   |                   |                   |                   |                   |                   |
| Residence                               |                   |                   |                   |                   |                   |                   |                   |                   |
| Urban                                   | 0.84 (0.62, 1.16) | 0.94 (0.71, 1.26) | -                 | -                 | 1.25 (0.89, 1.75) | 1.20 (0.88, 1.64) | 1.14 (1.07, 1.22) | 1.11 (1.05, 1.17) |
| Rural                                   | 0.98 (0.85, 1.13) | 1.01 (0.88, 1.16) | -                 | -                 | 1.26 (1.06, 1.48) | 1.23 (1.06, 1.44) | 1.24 (1.18, 1.31) | 1.25 (1.19, 1.32) |
| Wealth quintile of household            |                   |                   |                   |                   |                   |                   |                   |                   |
| Lowest                                  | 1.06 (0.91, 1.23) | 1.08 (0.95, 1.22) | 1.22 (0.85, 1.73) | 1.19 (0.95, 1.50) | 1.30 (1.18, 1.42) | 1.32 (1.21, 1.44) | 1.16 (1.06, 1.28) | 1.15 (1.06, 1.26) |
| Low                                     | 1.12 (0.97, 1.31) | 1.08 (0.95, 1.23) | 0.99 (0.73, 1.36) | 0.94 (0.73, 1.20) | 1.13 (0.95, 1.36) | 1.17 (0.98, 1.39) | 1.32 (1.20, 1.44) | 1.34 (1.23, 1.46) |
| Mid                                     | 1.03 (0.84, 1.27) | 1.05 (0.90, 1.23) | 1.18 (0.95, 1.48) | 1.06 (0.81, 1.38) | 1.25 (1.03, 1.52) | 1.20 (1.00, 1.43) | 1.26 (1.15, 1.38) | 1.25 (1.15, 1.36) |
| High                                    | 1.11 (0.94, 1.32) | 1.03 (0.91, 1.18) | 0.93 (0.72, 1.20) | 0.97 (0.75, 1.24) | 1.21 (0.96, 1.53) | 1.22 (1.00, 1.49) | 1.16 (1.06, 1.26) | 1.17 (1.08, 1.27) |
| Highest                                 | 1.11 (0.89, 1.40) | 1.07 (0.92, 1.24) | 1.23 (1.09, 1.39) | 1.18 (1.06, 1.31) | 1.32 (1.00, 1.74) | 1.23 (0.91, 1.65) | 1.14 (1.06, 1.24) | 1.09 (1.01, 1.17) |
| Length of marriage                      |                   |                   |                   |                   |                   |                   |                   |                   |
| <10                                     | 1.29 (0.97, 1.71) | 1.22 (1.02, 1.47) | -                 | -                 |                   |                   | 1.69 (0.64, 4.43) | 1.32 (0.69, 2.53) |
| ≥10                                     | 1.06 (0.98, 1.14) | 1.04 (0.97, 1.11) | -                 | -                 |                   |                   | 1.21 (1.16, 1.26) | 1.19 (1.15, 1.24) |
| <b>Individual level characteristics</b> |                   |                   |                   |                   |                   |                   |                   |                   |
| Age groups                              |                   |                   |                   |                   |                   |                   |                   |                   |
| Age < 65                                | 1.10 (0.99, 1.23) | 1.14 (1.04, 1.26) | 0.95 (0.48, 1.90) | 0.86 (0.51, 1.47) | 1.34 (1.22, 1.47) | 1.33 (1.21, 1.47) | 1.24 (1.18, 1.29) | 1.22 (1.16, 1.28) |
| Age ≥ 65                                | 1.06 (0.97, 1.17) | 1.00 (0.93, 1.08) | 1.11 (1.01, 1.21) | 1.07 (0.96, 1.18) | 1.12 (1.02, 1.23) | 1.16 (1.06, 1.27) | 1.12 (1.04, 1.21) | 1.16 (1.10, 1.22) |
| Education levels                        |                   |                   |                   |                   |                   |                   |                   |                   |
| Less than lower secondary               | 1.00 (0.81, 1.22) | 0.99 (0.85, 1.16) | 1.28 (1.14, 1.43) | 1.03 (0.84, 1.26) | 1.27 (1.18, 1.37) | 1.24 (1.15, 1.34) | 1.22 (1.17, 1.28) | 1.23 (1.17, 1.30) |
| Upper secondary and vocational training | 1.05 (0.95, 1.16) | 1.04 (0.96, 1.13) | 0.99 (0.81, 1.21) | 1.11 (0.98, 1.25) | 1.35 (1.02, 1.80) | 1.41 (1.16, 1.73) | 1.16 (1.06, 1.28) | 1.17 (1.10, 1.24) |
| Tertiary                                | 1.22 (1.02, 1.46) | 1.13 (1.02, 1.25) | 0.87 (0.73, 1.05) | 0.94 (0.79, 1.12) | 0.39 (0.15, 1.02) | 1.22 (0.88, 1.69) | 1.05 (0.84, 1.32) | 1.06 (0.95, 1.17) |

All values are survey weighted prevalence ratios with 95% robust confidence intervals.

**Table S8. Marginal associations of hypertension status of spouse with hypertension status of an individual using pooled data of four countries (n=33,978 couples)**

| <b>Cohort</b>                         | <b>Wives<br/>PR (95% CI)</b> | <b>Husbands<br/>PR (95% CI)</b> |
|---------------------------------------|------------------------------|---------------------------------|
| <b>USA</b>                            | 1.14 (1.05, 1.24)            | 1.09 (1.02, 1.17)               |
| <b>England</b>                        | 1.11 (0.99, 1.24)            | 1.07 (0.97, 1.18)               |
| <b>China</b>                          | 1.29 (1.19, 1.39)            | 1.29 (1.20, 1.38)               |
| <b>India</b>                          | 1.36 (1.30, 1.42)            | 1.31 (1.26, 1.37)               |
| <b>England:USA (exp[Interaction])</b> | 0.97 (0.88, 1.11)            | 0.98 (0.88, 1.11)               |
| <b>China:USA (exp[Interaction])</b>   | 1.13 (1.01, 1.26)            | 1.18 (1.07, 1.29)               |
| <b>India:USA (exp[Interaction])</b>   | 1.19 (1.08, 1.31)            | 1.20 (1.11, 1.30)               |

Reported associations are prevalence ratios (95%CI) based on Equation 3a-b after adjusting for individual (BMI, age, education, wage employment, smoking, heavy drinking, moderate physical activity, vigorous physical activity) and household characteristics (wealth, number of residents, rural/urban residence, length of marriage).

**Figure S1. Distribution of blood pressure by country for wives and husbands.**

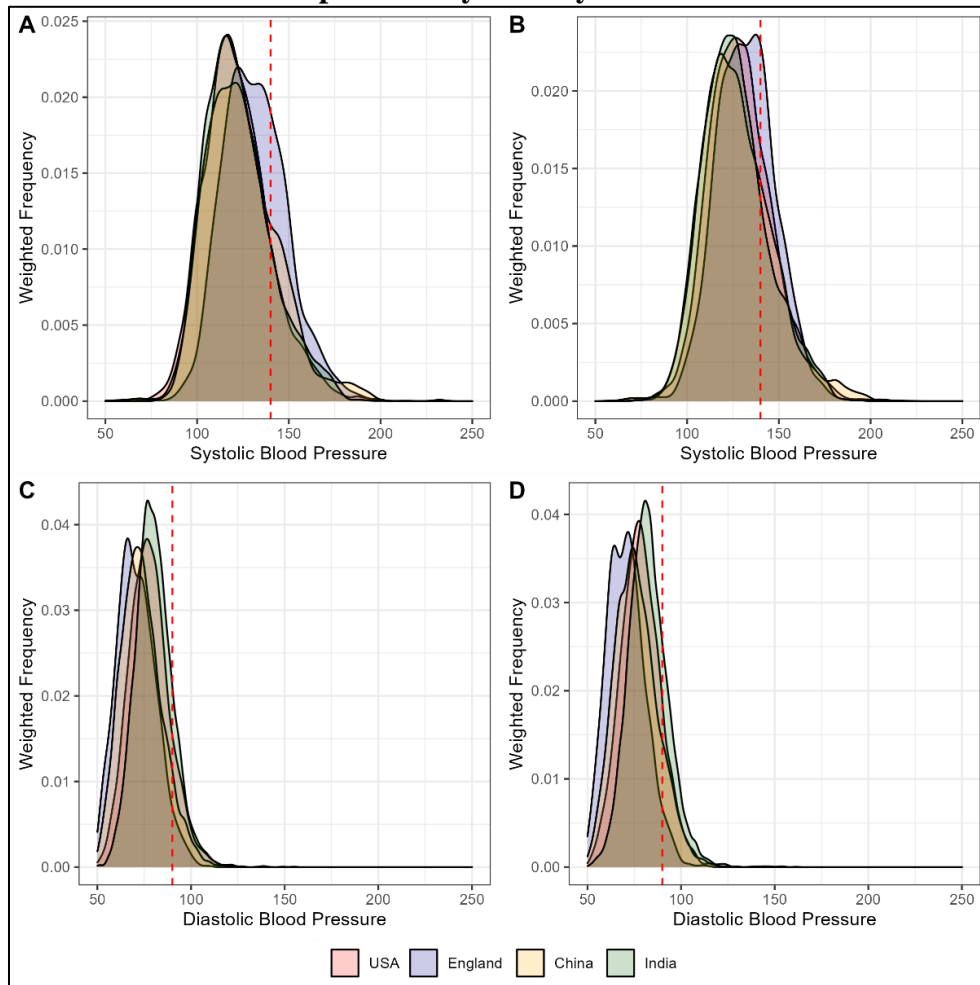

Distributions are density plots weighted using normalized survey weights that account for differences in sample sizes between countries.

A: Systolic BP among wives, B: Systolic BP among husbands; C: Diastolic BP among wives; D: Diastolic BP among husbands
